# Supplementary material
Source: PubMed Central journal article supplement (PMC4068634)
Supplement: supp_003434_DMM003434FigS2.pdf [file supp_003434_DMM003434FigS2.pdf]

*elongation factor 1a* promoter, forward:

GCGCTCTAGAGAGATTTTGTAACCACTCAAATTCCC  
*Xba*I

*elongation factor 1a* promoter, reverse:

CGCTGGTACCTTAATATGAGTCTTGTCTTTCAT  
*Eco*RI

*elongation factor 1a* promoter, reverse:

CCGGCATGCGGAAGGTTGGGGTTAACCGAAT  
*Sph*I

hAPP695, forward:

GGCCGCATGCTGCCCGGTTTGGCACTG  
*Sph*I

hAPP695, reverse:

GCGCGGATCCGTTCTGCATCTGCTCAAAGAAC  
*Bam*H1

hAPP695 *Bam*H1 knockout, sense:

CATGGTGGACCCCAAGAAAG

hAPP695 *Bam*H1 knockout, antisense:

CTTTCTTGGGGTCCACCATG

hAPP695  $\beta$ -site mutant K670N, M671L, sense:

TCTGAAGTGAACCTTGGATGCAGAATTCCGAC

hAPP695  $\beta$ -site mutant K670N, M671L, antisense:

GTCGGAATTCTGCATCCAAGTTCACCTCAGA

hAPP695  $\gamma$ -site mutant T714I, I716V, V717I, sense:

APP<sub>mt</sub> $\gamma$ : GTTGTCATAGCGATAGTGGTCATCATCACCTTGGTGATGCTG

hAPP695  $\gamma$ -site mutant T714I, I716V, V717I, antisense:

CAGCATCACCAAGGTGATGATGACCACTATCGCTATGACAAC

*synaptotagmin* promoter, forward:

CGCTCTAGAGGTCAGAGTTCGCCATTTCTTTGGTGGC  
*Xba*I

*synaptotagmin* promoter, reverse:

CGCGGTACCGCATGCCCTTGCTTCCACGCTAACTTTAGTTG  
*Sph*I

*synaptotagmin* *Eco*RI knockout, sense:

TAAAGTATTCTAAAGCCGTATCTTCACGACTCC

*synaptotagmin* *Eco*RI knockout, antisense:

GGAGTCGTGAAGATACGGCTTTAGAATACTTTA

APP signal peptide, forward:

GGCCGCATGCTGCCCCGTTTGGC

*SphI*

Signal peptide amyloid beta overlap, sense:

GGAGGTTCCCGATGCAGAATTTGACATGACT

Signal peptide amyloid beta overlap, antisense:

ATTCTGCATCGGGAACCTCCAGCGCC

Human amyloid beta reverse for A $\beta$ :

CCGGAATTCTACGCTATGACAACACCGCC

*EcoRI*

Human amyloid beta reverse for A $\beta$ -CFP:

GCGCGGATCCCGCTATGACAACACCGCC

*BamHI*

All primer sequences are 5' to 3'.
